# Supplementary material for: Tuning the topographical parameters of Si pyramids for a better surface enhanced Raman response
Source: Royal Society of Chemistry journal article supplement (doi:10.1039/d1cp03576b), 2021-01-01
Supplement: d1cp03576b1.pdf [file d1cp03576b1.pdf]

# Supporting Information

## Tuning the Topographical Parameters of Si Pyramids for a Better Surface Enhanced Raman Response

Shinki,\* Jaspreet Singh, and Subhendu Sarkar

*Surface Modifications and Applications Laboratory (SMAL), Department of Physics, Indian  
Institute of Technology Ropar, Rupnagar, Punjab, 140001 India*

E-mail: shinki.physics@iitrpr.ac.in

### Method employed for quantification of Si-pyramidal structures

To examine the uniformity of pyramidal textures on Si surfaces with increasing etching time, standard deviation method was used. The standard deviation is a quantity which express the degree of dispersion of group values from the mean value of the group. It is calculated by square root of the arithmetic mean of the deviation squared between individual values and their mean. As the etching time increases the pyramidal base size and height also changes with time. So, if the standard deviation of the pyramidal base length/ height is directly used to evaluate will lead to error in determine the uniformity. Therefore, the base length of the pyramidal surface is normalized first with average base length.

The average base length of the pyramidal surface is calculated by equation(1).

$$B_a = \frac{\sum_{i=1}^n B_i}{n} \quad (1)$$

where  $B_a$  represents the average base length.

$$b_i = \frac{B_i}{B_a} \quad (2)$$

where  $b_r$  represents the relative base length. The relative standard deviation  $S_{br}$  is calculated by the equation (3).

$$S_{br} = \sqrt{\frac{1}{n} \sum_{i=1}^n (b_i - 1)^2} \quad (3)$$

## Pyramid Height calculation

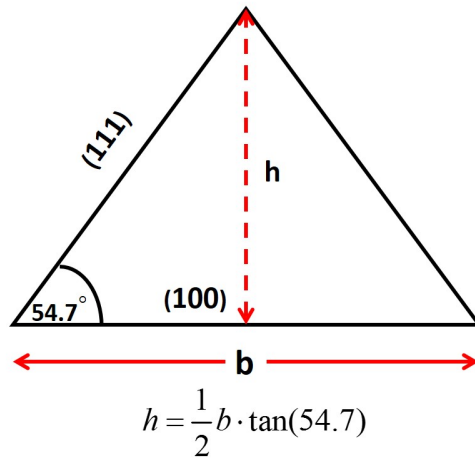

Figure S1: Geometry of a pyramid on a etched Si wafer in two dimensions

## Calculated height distribution of pyramidal surfaces

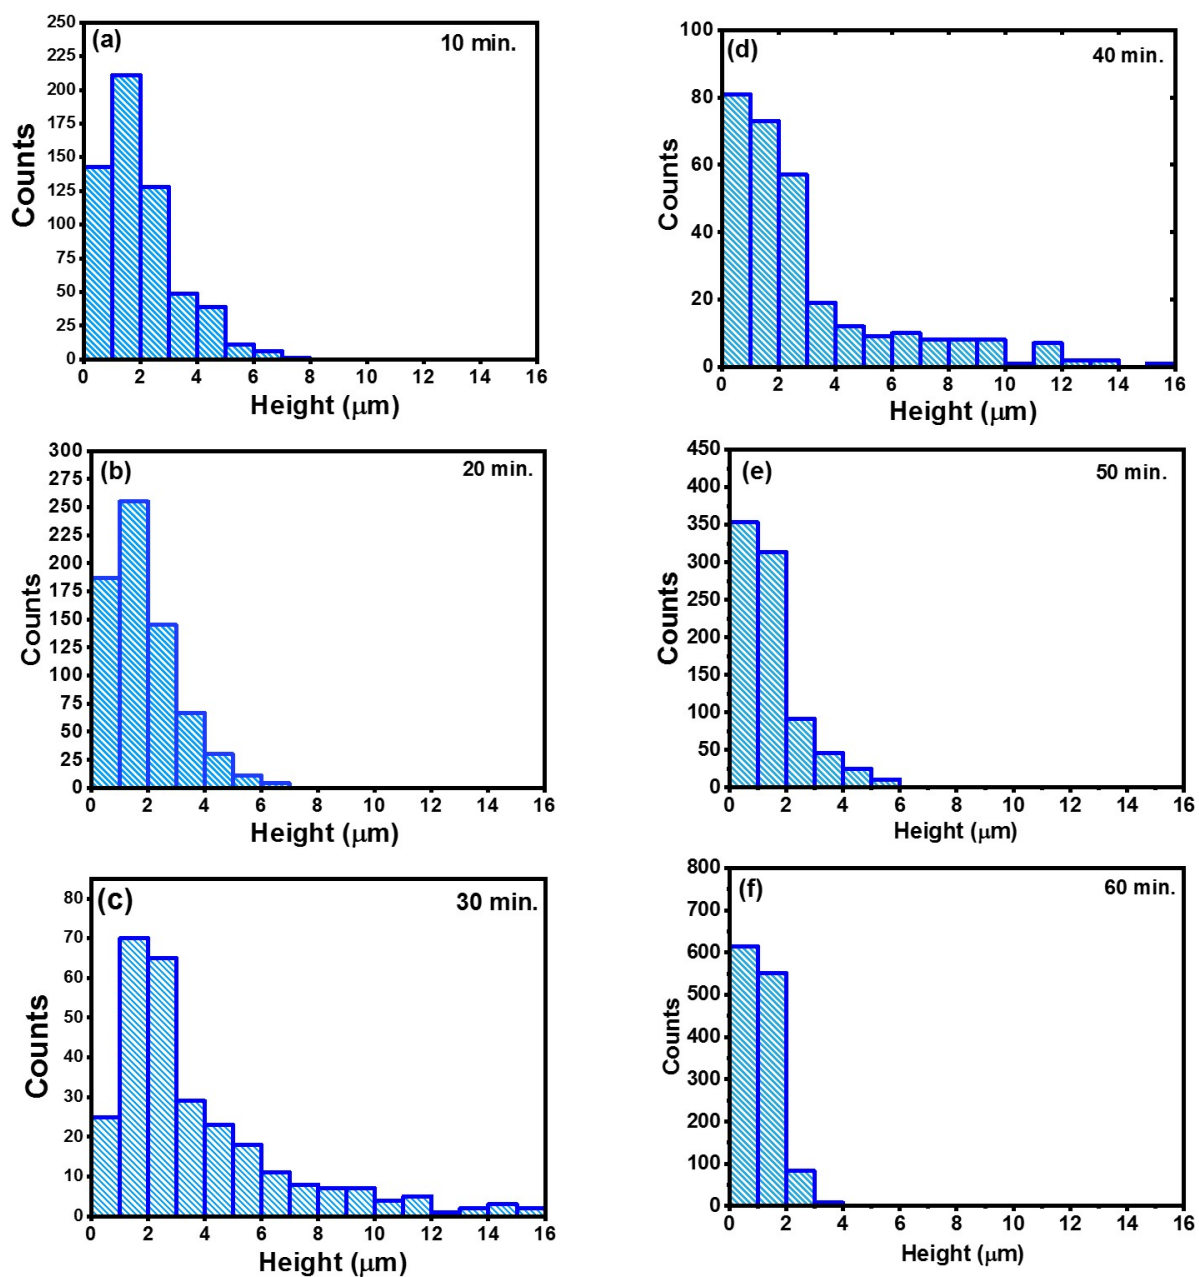

Figure S2: Calculated height distribution from SEM images for (a) 10 min. (b) 20 min. (c) 30 min. (d) 40 min. (e) 50 min. (f) 60 min. etch time respectively.

# EDX spectra confirming the 50% - 50% concentration of Au- Ag alloy

Application Note  
Company / Department

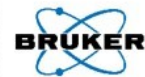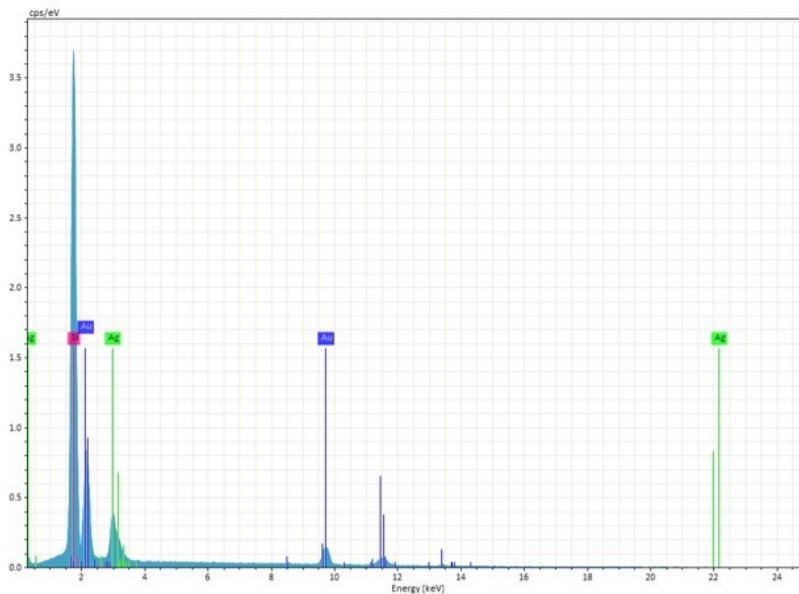

4086

| Element | At. No. | Netto  | Mass  | Mass Norm. | Atom   | abs. error | %         | rel. error | % |
|---------|---------|--------|-------|------------|--------|------------|-----------|------------|---|
|         |         |        | [%]   | [%]        | [%]    | [1 sigma]  | [1 sigma] |            |   |
| Silicon | 14      | 103880 | 45.20 | 50.23      | 84.14  | 2.01       | 4.45      |            |   |
| Silver  | 47      | 16529  | 18.13 | 20.15      | 8.79   | 0.62       | 3.42      |            |   |
| Gold    | 79      | 9116   | 24.65 | 29.62      | 7.07   | 0.76       | 2.87      |            |   |
| Sum     |         | 89.96  |       | 100.00     | 100.00 |            |           |            |   |

4086

| Element | At. No. | Netto | Mass  | Mass Norm. | Atom   | abs. error | %         | rel. error | % |
|---------|---------|-------|-------|------------|--------|------------|-----------|------------|---|
|         |         |       | [%]   | [%]        | [%]    | [1 sigma]  | [1 sigma] |            |   |
| Silver  | 47      | 16390 | 24.22 | 35.71      | 50.35  | 0.82       | 3.39      |            |   |
| Gold    | 79      | 9129  | 43.60 | 64.29      | 49.65  | 1.23       | 2.83      |            |   |
| Sum     |         | 67.81 |       | 100.00     | 100.00 |            |           |            |   |

Figure S3: Edx Data Report.

## AFM line profile for thickness measurement

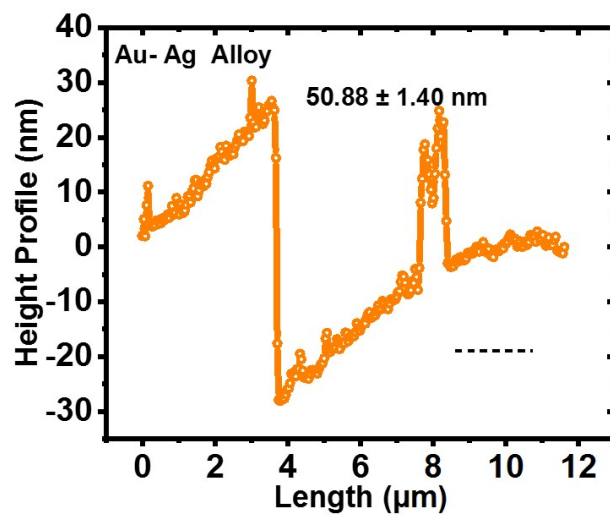

Figure S4: Line profile of AFM images for  $\text{Au}_{0.5}\text{Ag}_{0.5}$  alloy nanolayer thickness measurements.

### References:

1. Shinki and Subhendu sarkar,  $\text{Au}_{0.5}\text{Ag}_{0.5}$  Alloy Nanolayer Deposited on Pyramidal Si Arrays as Substrates for Surface-Enhanced Raman Spectroscopy **2020**, 2, 7088 .

## Real Time normal Raman spectra from reference sample (Plane Si)

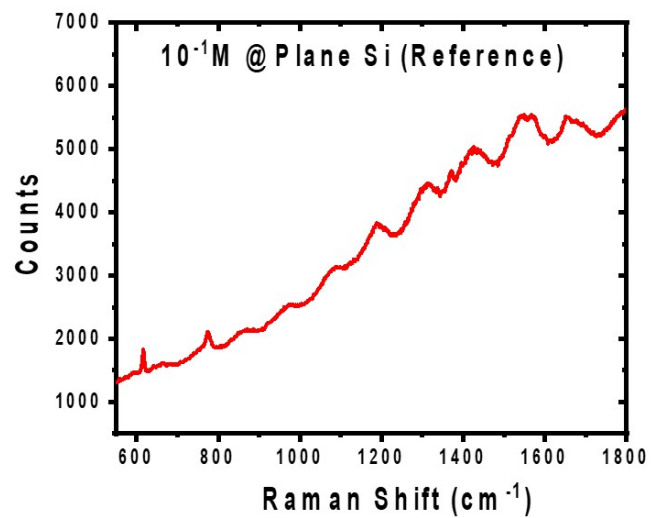

Figure S5: Real time Raman Spectra from reference sample

## Vibration modes assigned for Raman peak of Rh6G molecule

Table S1: Vibration modes corresponding to each Raman peak for Rh6G molecule.

|                                    |                        |                     |                      |                      |                            |
|------------------------------------|------------------------|---------------------|----------------------|----------------------|----------------------------|
| Wavenumber<br>( $\text{cm}^{-1}$ ) | 612                    | 776                 | 1186                 | 1316                 | 1368, 1513, 1578, 1652     |
| Vibration<br>mode                  | C-C-C Ring<br>in-plane | C-H<br>out-of plane | C-H in<br>plane bend | N-N in<br>plane bend | aromatic C-C<br>stretching |

## Calculation of SERS enhancement factor for $612 \text{ cm}^{-1}$ Peak

$\lambda$  = Wavelength of the excitation laser used = 532 nm

NA = Numerical Aperture = 0.5

$\rho$  = Density of analyte molecule ( $\text{gm}/\text{cm}^3$ ) = 1.26

A = Area of the sample ( $\text{cm}^2$ ) = 1

Effective surface area of sample after consideration of pyramidal shape with mean base length and height

| Etch time<br>(min) | Area coverage<br>by Pyramids (%) | Slant Height<br>( $\mu\text{m}$ ) | Effective Surface<br>Area ( $\text{cm}^2$ ) |
|--------------------|----------------------------------|-----------------------------------|---------------------------------------------|
| 10                 | 57                               | 2.40                              | 1.42                                        |
| 20                 | 60                               | 2.28                              | 1.43                                        |
| 30                 | 90                               | 4.61                              | 1.65                                        |
| 40                 | 95                               | 3.71                              | 1.69                                        |
| 50                 | 100                              | 1.93                              | 1.72                                        |
| 60                 | 100                              | 1.38                              | 1.73                                        |

w = weight of the analyte present in the solution spread on the sample (ng) = 4.79

Laser spot diameter  $w_0 = 1.22 \lambda / \text{NA}$

Laser focal depth ( $z_0$ ) =  $(2\pi/\lambda) w_0^2$

Laser focal volume ( $\tau$ ) =  $(\pi/2)^{3/2} w_0^2 (z_0)$

$N_{bulk} = [(\text{confocal volume} \times \text{Density}) / \text{molecular weight}] \times \text{Avogadro's number } (N_A)$

$N_{SERS} = [(\text{Laser spot area} / \text{Substrate area}) \times \text{volume } (V) \times \text{concentration } (C)]$



| $I_{SERS}$ | $I_{bulk}$ | $I_{SERS}/I_{bulk}$ | $N_{bulk}/N_{SERS} \times 10^6$ | $I_{SERS}/I_{bulk} \times N_{bulk}/N_{SERS} \times 10^7$ | EF ( $\times 10^8$ ) |
|------------|------------|---------------------|---------------------------------|----------------------------------------------------------|----------------------|
| 7145       | 347        | 20.59               | 1.85                            | 3.80                                                     | 0.38                 |
| 10699      | 347        | 30.83               | 1.88                            | 5.79                                                     | 0.58                 |
| 3889       | 347        | 11.20               | 2.17                            | 2.43                                                     | 0.24                 |
| 5165       | 347        | 14.88               | 2.21                            | 3.29                                                     | 0.33                 |
| 15781      | 347        | 45.47               | 2.26                            | 10.3                                                     | 1.03                 |
| 21745      | 347        | 62.66               | 2.27                            | 14.2                                                     | 1.42                 |

## References:

1. Rao, V. K.; Radhakrishnan, T. P. Tuning the SERS Response with Ag-Au Nanoparticle Embedded Polymer Thin Film Substrates. *ACS Appl. Mater. Interfaces* **2015**, 7, 12767–12773.
2. Roy, A.; Maiti, A.; Chini, T. K.; Satpati, B. Annealing Induced Morphology of Silver Nanoparticles on Pyramidal Silicon Surface and Their Application to Surface-Enhanced Raman Scattering. *ACS Appl. Mater. Interfaces* **2017**, 9, 34405–34415.

Raman mapping analysis on comparing with map area for 10 min. etch surface

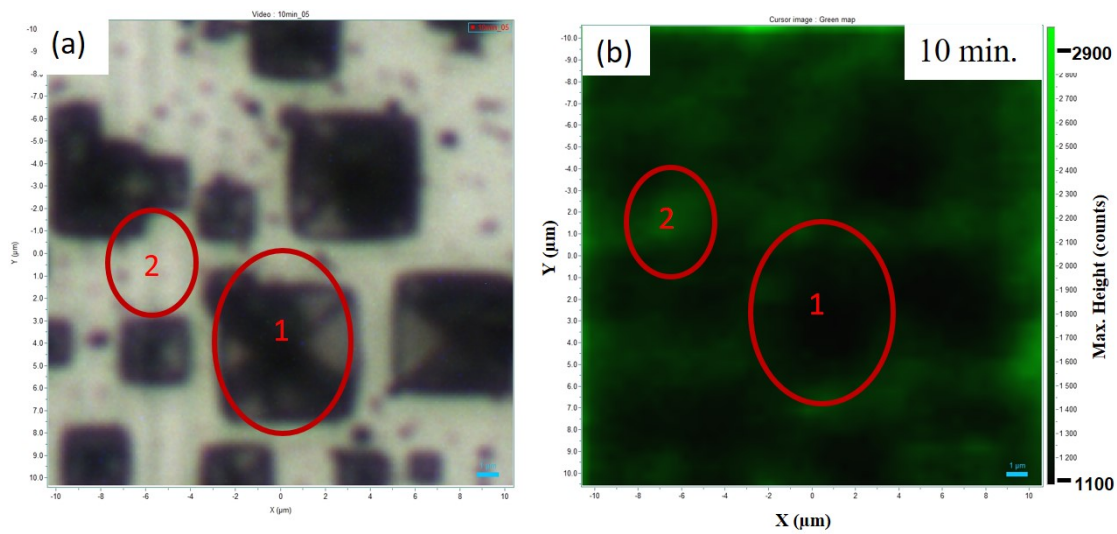

Figure S6: Raman mapping analysis on comparing with map area for 10 min. etch surface

Normal Raman spectra of MB and MP from reference sample (plane Si) with 1 mM bulk concentration of both analytes

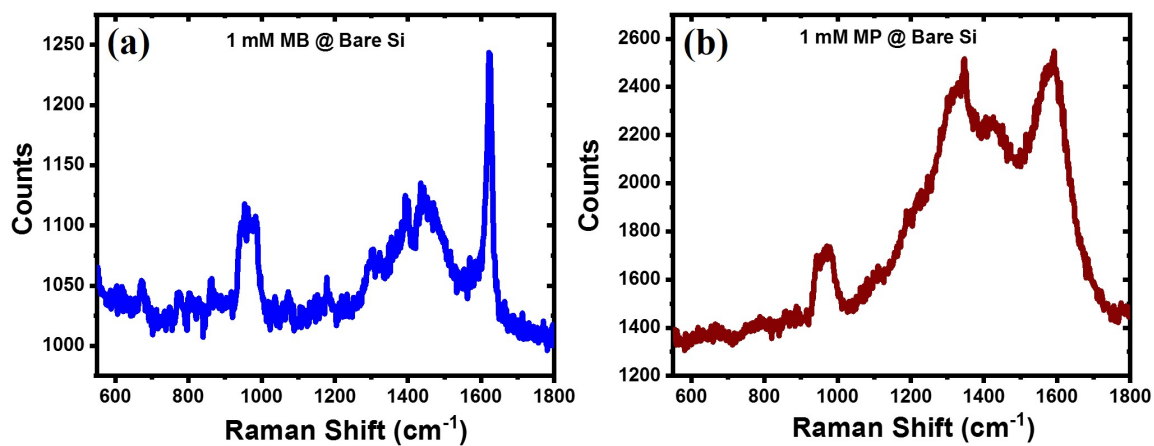

Figure S7: Real time Raman Spectra of MB and MP from reference sample
